# Supplementary material for: CRISPR/Cas9-Mediated Knockin Application in Cell Therapy: A Non-viral Procedure for Bystander Treatment of Glioma in Mice
Source: PubMed Central journal article supplement — Mol Ther Nucleic Acids. 2017 Jul 18;8:395–403. doi: 10.1016/j.omtn.2017.07.012 (PMC5537198; doi:10.1016/j.omtn.2017.07.012), 2017-07-18
Supplement: mmc1.pdf [file mmc1.pdf]

**OMTN, Volume 8**

**Supplemental Information**

**CRISPR/Cas9-Mediated Knockin Application  
in Cell Therapy: A Non-viral Procedure  
for Bystander Treatment of Glioma in Mice**

**Oscar Meca-Cortés, Marta Guerra-Rebollo, Cristina Garrido, Salvador Borrós, Nuria Rubio, and Jeronimo Blanco**

**SUPPLEMENTAL FIGURES**

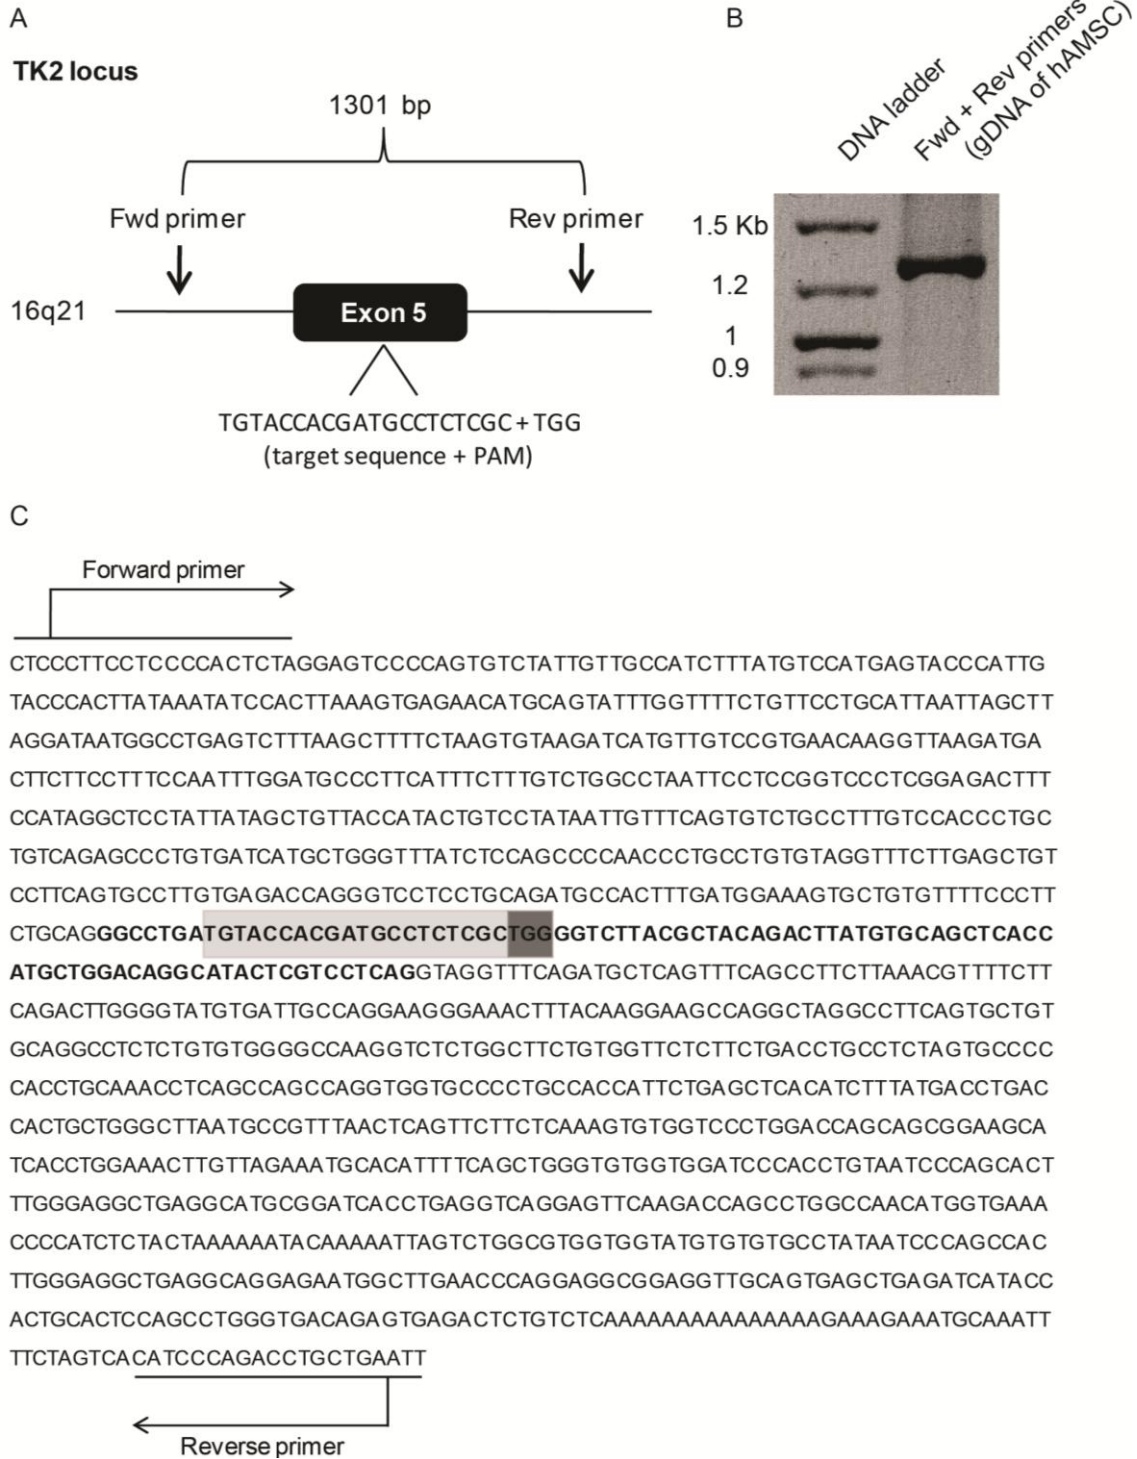

**Figure S1. Assessment of the integrity of the selected target sequence in exon 5 of the *TK2* gene in hAMSCs. (A) Diagram showing the chosen Cas9 nuclease target sequence within exon 5 of *TK2* locus and the expected PCR amplicon size. (B) Agarose gel showing PCR generated amplicon. (C) Sequence corresponding to PCR amplicon. Exon 5 is highlighted (bold), including Cas9 nuclease target sequence (grey-shaded) and PAM (dark grey-shaded).**

Amplicon around 5' junction, 1079 bp

Fwd primer (gDNA)

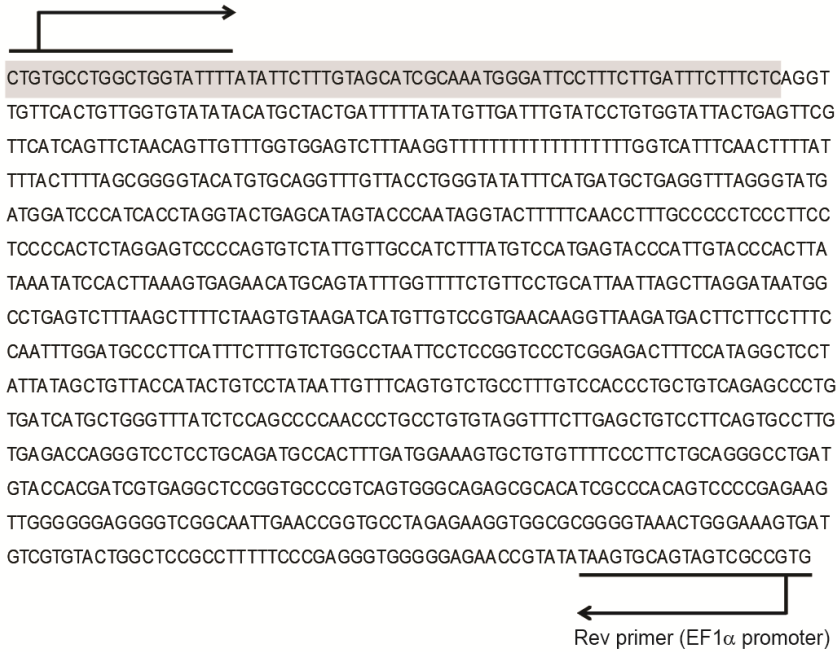

Amplicon around 3' junction, 1361 bp

Fwd primer (tTK gene)

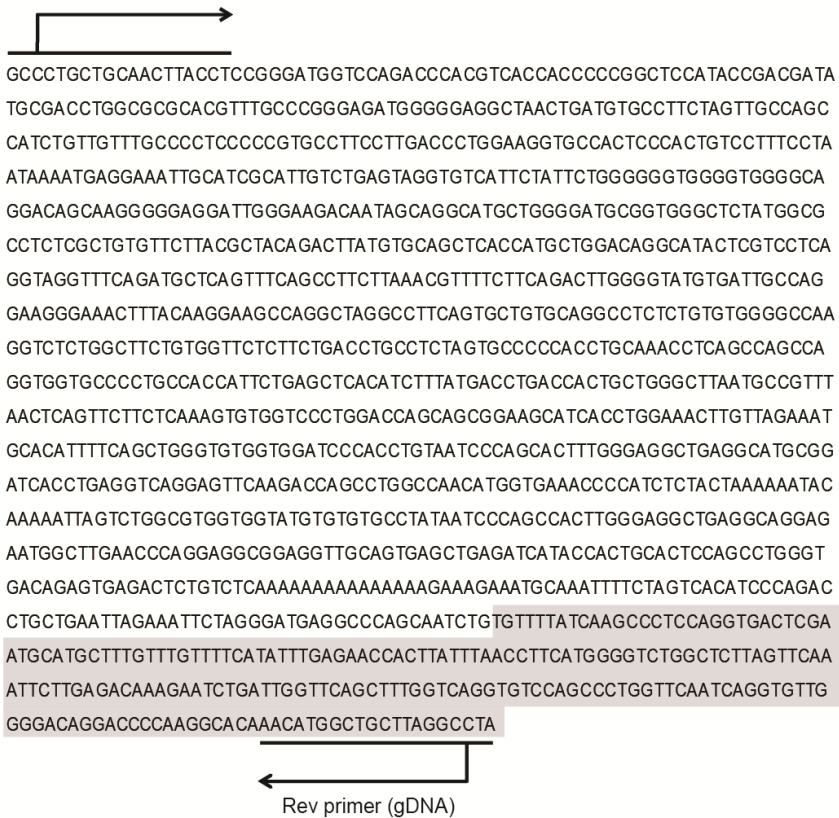

**Figure S2. DNA sequence of predicted amplicons indicating integration of donor plasmid elements in exon 5 of *TK2* locus in hAMSCs.** Amplicon sequences were obtained by PCR amplification of genomic DNA from putative CRISPR/Cas9-engineered hAMSCs using primers (underlined) flanking 5' and 3' junctions of integrated and genomic sequences (indicated as transition from non-shaded and grey-shaded nucleotides).

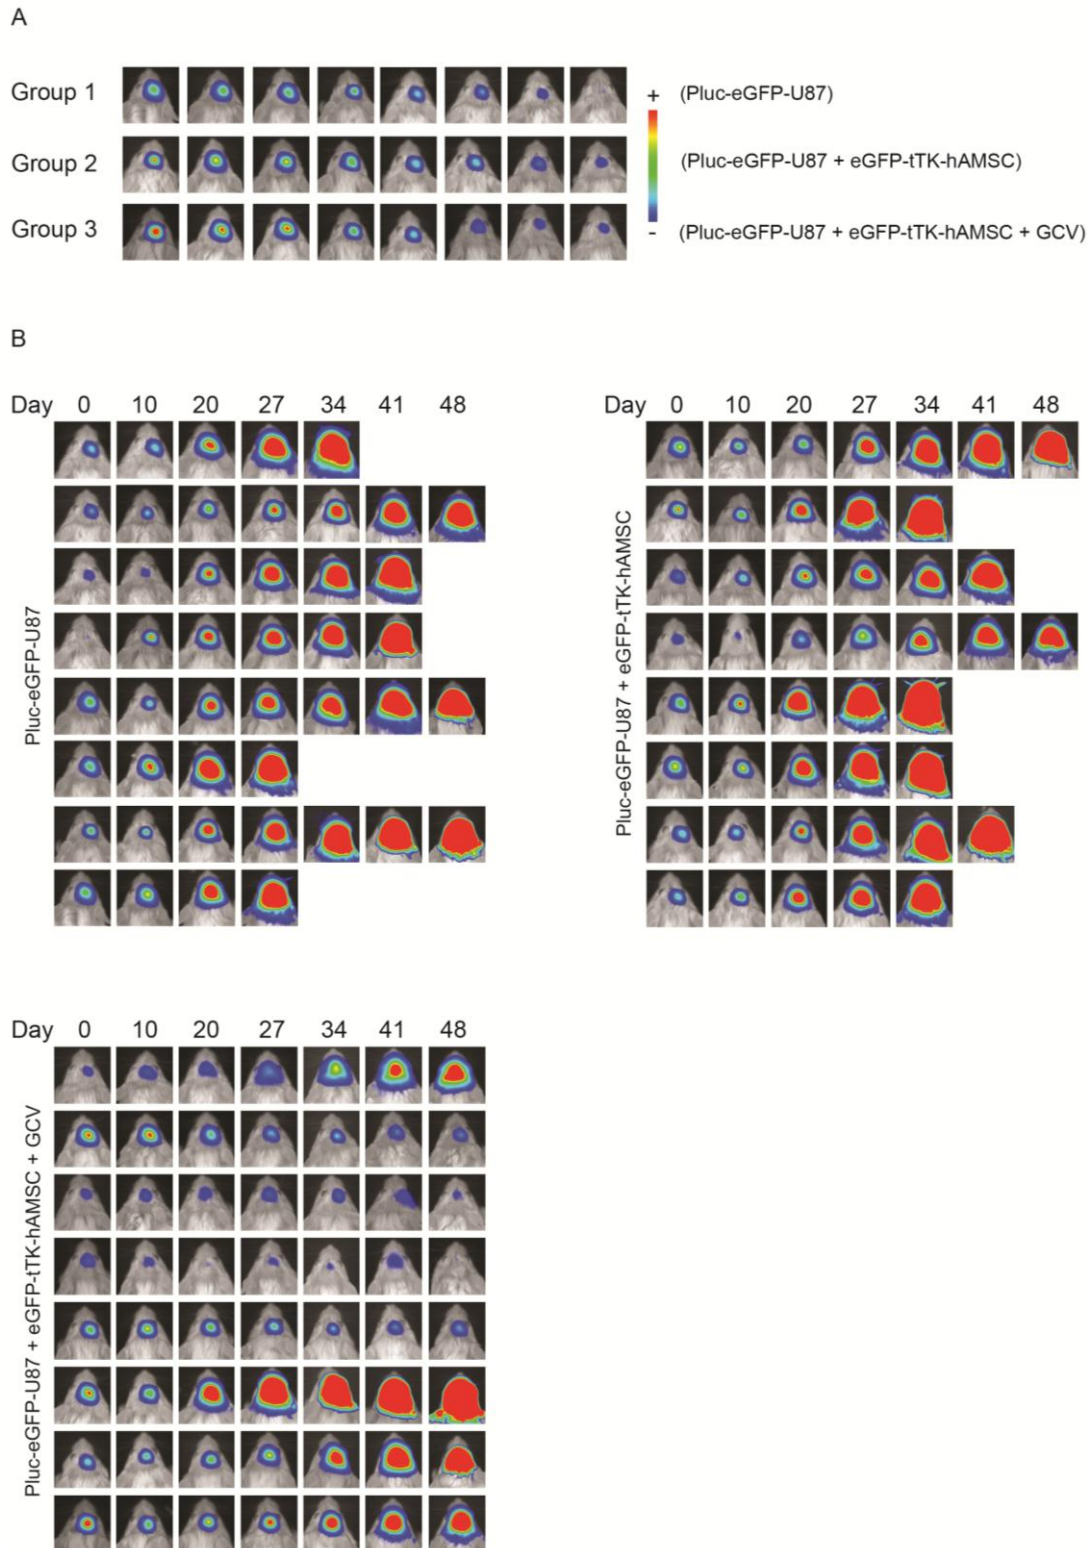

**Figure S3. Initial homogenization of experimental groups for *in vivo* assessment of bystander glioblastoma therapy of CRISPR/Cas9-modified hAMSCs and tumor growth development in all mice until day 48.** (A) Non-invasive BLI images were acquired as described above 5 days post-implantation of tumor cells and animals were separated in 3 groups with similar light emission capacity. (B) 48 day non-invasive BLI monitoring of tumor growth. Images show all mice from (A). BLI images (false color palette ranging from blue = low intensity, to red = high intensity light emission) are overlaid on bright field images.

## Time-scale of CRISPR/Cas9-mediated knock-in in hAMSCs for glioma cell therapy

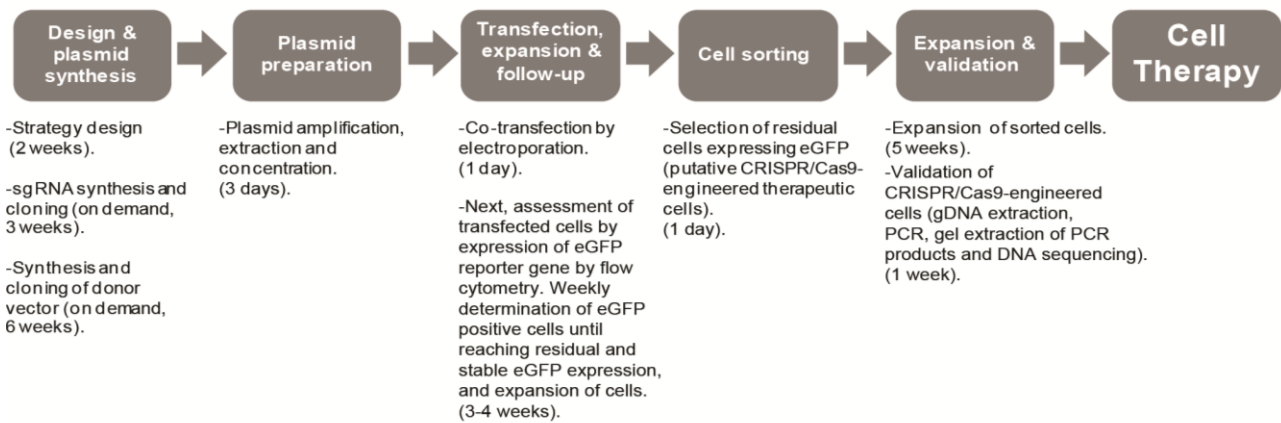

Working time approx. 8 weeks

Figure S4. Flow diagram showing the strategy for generating therapeutic hAMSCs through CRISPR/Cas9-mediated knock-in in this study.

### SUPPLEMENTAL DATA FILES

5' homology arm, including 5'-end exon 5 of *TK2* gene (bold) and 11 of 20 nucleotides of target sequence (underlined)

AGGTTGTTCACTGTTGGTGTATATACATGCTACTGATTTTTATATGTTGATTTGTATCCTGTGG  
TATTACTGAGTTCGTTTCATCAGTTCTAACAGTTGTTGGTGGAGTCTTTAAGGTTTTTTTTTTT  
TTTTTTGGTCATTTCAACTTTTATTTTACTTTTAGCGGGTACATGTGCAGGTTTGTACCTG  
GGTATATTTTCATGATGCTGAGGTTTAGGGTATGATGGATCCCATCACCTAGGTACTGAGCAT  
AGTACCCAATAGGTACTTTTTCAACCTTTGCCCTCCCTTCTCCCACTCTAGGAGTCCCC  
AGTGTCTATTGTTGCCATCTTTATGTCCATGAGTACCCATTGTACCCACTTATAAATATCCAC  
TTAAAGTGAGAACATGCAGTATTTGGTTTTCTGTTCCCTGCATTAATTAGCTTAGGATAATGGC  
CTGAGTCTTTAAGCTTTTCTAAGTGTAAGATCATGTTGTCCGTGAACAAGGTTAAGATGACTT  
CTTCCTTTCCAATTTGGATGCCCTTCATTTCTTTGTCTGGCCTAATTCCTCCGGTCCCTCGGAG  
ACTTTCCATAGGCTCCTATTATAGCTGTTACCATACTGTCCTATAATTGTTTCAGTGTCTGCCT  
TTGTCCACCCTGCTGTGAGAGCCCTGTGATCATGCTGGGTTTATCTCCAGCCCCAACCTGCC  
TGTGTAGGTTTCTTGAGCTGTCCTTCAGTGCCTTGTGAGACCAGGGTCTCCTGCAGATGCCA  
CTTTGATGGAAAGTGCTGTGTTTTCCCTTCTGCAGGGCCTGATGTACCACGAT

### EF1 $\alpha$ promoter

CGTGAGGCTCCGGTGCCCGTCAGTGGGCAGAGCGCACATCGCCACAGTCCCCGAGAAGTT  
GGGGGAGGGTTCGGCAATTGAACCGGTGCCTAGAGAAGGTGGCGCGGGGTAAACTGGGA  
AAGTGATGTCGTGACTGGCTCCGCCTTTTTCCCGAGGGTGGGGGAGAACCCTATATAAGTG  
CAGTAGTCGCCGTGAACGTTCTTTTTTCGCAACGGGTTTGCCGCCAGAACACAGGTAAGTGCC  
GTGTGTGGTTCCCGCGGGCCTGGCCTCTTACGGGTTATGGCCCTTGCCTGCTTGAATTACT  
TCCACCTGGCTGCAGTACGTGATTTCTGATCCCGAGCTTCGGGTTGGAAGTGGGTGGGAGAG  
TTCGAGGCCTTGCCTTAAGGAGCCCCTTCGCCTCGTGTGAGTTGAGGCCTGGCCTGGGC  
GCTGGGGCCCGCGGTGCGAATCTGGTGGCACCTTCGCGCCTGTCTCGCTGCTTTTCGATAAG  
TCTCTAGCCATTTAAAATTTTTGATGACCTGCTGCGACGCTTTTTTCTGGCAAGATAGTCTT  
GTAATGCGGGCCAAGATCTGCACACTGGTATTTTCGGTTTTTGGGGCCCGGGCGGACCGG  
GGCCCGTGCCTCCAGCGCACATGTTCCGGCAGGCGGGGCTGCGAGCGCGGCCACCCGAGA  
ATCGGACGGGGGTAGTCTCAAGCTGGCCGGCCTGCTCTGGTGCCTGGCTCGCGCCCGCTG  
TATCGCCCCGCCCTGGGCGGCAAGGCTGGCCCGTTCGGCACAGTTGCGTGAGCGGAAAGA  
TGGCCGCTTCCCGGCCCTGCTGCAGGGAGCTCAAATGGAGGACGCGGCGCTCGGGAGAGC  
GGGCGGGTGAATCACCCACACAAAGGAAAAGGGCCTTCCGTCTCAGCCGTCGCTTCATGT

GACTCCACGGAGTACCGGGCGCCGTCCAGGCACCTCGATTAGTTCTCGAGCTTTTGGAGTAC  
GTCGTCTTTAGGTTGGGGGAGGGGTTTTATGCGATGGAGTTTCCCACACTGAGTGGGTGG  
AGACTGAAGTTAGGCCAGCTTGGCACTTGATGTAATTCTCCTTGGAAATTTGCCCTTTTTGAGT  
TTGGATCTTGGTTCATTCTCAAGCCTCAGACAGTGGTTCAAAGTTTTTTTTCTTCCATTTAGGT  
GTCGTGAGGAATTAGCC

***eGFP* gene**

ATGGTGAGCAAGGGCGAGGAGCTGTTACCGGGGTGGTGCCCATCCTGGTTCGAGCTGGACG  
GCGACGTAAACGGCCACAAGTTCAGCGTGTCCGGCGAGGGCGAGGGCGATGCCACCTACGG  
CAAGCTGACCCTGAAGTTCATCTGCACCACCGCAAGCTGCCCGTACCCTGGCCACCCTCG  
TGACCACCCTGACCTACGGCGTGCAGTGCTTCAGCGCTACCCCGACCACATGAAGCAGCAC  
GACTTCTTCAAGTCCGCCATGCCCGAAGGCTACGTCCAGGAGCGCACCATCTTCTTCAAGGA  
CGACGGCAACTACAAGACCCGCGGAGGTGAAGTTCGAGGGCGACACCCTGGTGAACCGC  
ATCGAGCTGAAGGGCATCGACTTCAAGGAGGACGGCAACATCCTGGGGCACAAGCTGGAGT  
ACAACACTACAAGCCACAACGTCTATATCATGGCCGACAAGCAGAAGAACGGCATCAAGGT  
GAACTTCAAGATCCGCCACAACATCGAGGACGGCAGCGTGCAGCTCGCCGACCACTACCAG  
CAGAACACCCCATCGGCGACGGCCCCGTGCTGCTGCCCGACAACCACTACCTGAGCACCCA  
GTCCGCCCTGAGCAAAGACCCCAACGAGAAGCGCGATCACATGGTCCTGCTGGAGTTCGTG  
ACCGCCGCCGGGATCACTCTCGGCATGGACGAGCTGTACAAG

**Spacer sequence**

ACCGCGGGCCCGGGATCCGCCAC

**Herpes simplex virus 1 truncated thymidine kinase gene (*tTK*)**

ATGCCACGCTACTGCGGGTTATATAGACGGTCCCCACGGGATGGGGAAAACCACCACCA  
CGAACTGCTGGTGGCCCTGGGTTTCGCGGACGATATCGTCTACGTACCCGAGCCGATGACT  
TACTGGCGGGTGTGGGGGCTTCCGAGACAATCGCGAACATCTACACCACACAACACCGCCT  
CGACCAGGGTGAGATATCGGCCGGGGACGCGGCGGTGGTAATGACAAGCGCCCAGATAACA  
ATGGGCATGCCTTATGCCGTGACCGACGCCGTTCTGGCTCCTCATATCGGGGGGGAGGCTGG  
GAGCTCATATGCCCCGCCCGGCCCTCACCATCTTCTCGACCGCCATCCCATCGCCTTCAT  
GCTGTGCTACCCGGCCGCGCGGTACCTTATGGGCAGCATGACCCCCAGGCCGTGCTGGCGT  
TCGTGGCCCTCATCCCCGCGACCTTGCCCGCACCAACATCGTGTGTTGGGGCCCTTCCGGAG  
GACAGACACATCGACCGCCTGGCCAAACGCCAGCGCCCCGGCGAGCGGCTGGACCTGGCTA  
TGCTGGGTGCGATTGCGCCGCTTACGGGCTACTTGCCAATACGGTGCGGTATCTGCAGTGC  
GGCGCTCGTGGCGGAGGACTGGGGACAGCTTTCGGGGACGGCCGTGCCGCCCGGGGTG  
CCGAGCCCCAGAGCAACGCGGGCCACGACCCCATATCGGGGACACGTTATTTACCCTGTTT  
CGGGCCCCGAGTTGCTGGCCCCAACGGCGACCTGTATAACGTGTTTGCCTGGGCCTTGG  
CGTCTTGCCAAACGCCTCCGTTCCATGCACGTCTTATCCTGGATTACGACCAATCGCCCCG  
CGGCTGCCGGGACGCCCTGCTGCAACTTACCTCCGGGATGGTCCAGACCCACGTACCAACC  
CCGGCTCCATACCGACGATATGCGACCTGGCGCGCACGTTTGCCCGGGAGATGGGGGAGGC  
TAACTGA

**BGH pA signal**

TGTGCCTTCTAGTTGCCAGCCATCTGTTGTTTGGCCCTCCCCCGTGCCTTCCTTGACCCTGGA  
AGGTGCCACTCCCCTGTCCTTTCCTAATAAAATGAGGAAATTGCATCGCATTGTCTGAGTA  
GGTGTCAATTCTATTCTGGGGGGTGGGGTGGGGCAGGACAGCAAGGGGGAGGATTGGGAAGA  
CAATAGCAGGCATGCTGGGGATGCGGTGGGCTCTATGGC

**3' homology arm, including 3'-end exon 5 of *TK2* gene (bold), 9 of 20 nucleotides of target sequence (underlined) and PAM mutations (lower case)**

**GCCTCTCGCTGtGtTCTTACGCTACAGACTTATGTGCAGCTCACCATGCTGGACAGGCAT**  
**ACTCGTCCTCAGGTAGGTTTCAGATGCTCAGTTTCAGCCTTCTTAAACGTTTTCTTCAGACTT**  
GGGGTATGTGATTGCCAGGAAGGGAACTTTACAAGGAAGCCAGGCTAGGCCTTCAGTGCT  
GTGCAGGCCCTCTGTGTGGGGCCAAGGTCTCTGGCTTCTGTGGTTCTTCTGACCTGCCTC  
TAGTGCCCCACCTGCAAACCTCAGCCAGCCAGGTGGTGCCCTGCCACCATCTGAGCTCA  
CATCTTTATGACCTGACCACTGCTGGGCTTAATGCCGTTTAACTCAGTTCTTCTCAAAGTGTG  
GTCCCTGGACCAGCAGCGGAAGCATCACCTGGAAACTTGTAGAAATGCACATTTTCAGCTG  
GGTGTGGTGATCCACCTGTAATCCACACTTTGGGAGGCTGAGGCATCGGGATCGGGATCACCTG  
AGGTCAGGAGTTCAAGACCAGCCTGGCCAACATGGTGAACCCCATCTCTACTAAAAATA

CAAAAATTAGTCTGGCGTGGTGGTATGTGTGTGCCTATAATCCCAGCCACTTGGGAGGCTGA  
GGCAGGAGAATGGCTTGAACCCAGGAGGCGGAGGTTGCAGTGAGCTGAGATCATACCACTG  
CACTCCAGCCTGGGTGACAGAGTGAGACTCTGTCTCAAAAAAAAAAAAAAAAAAGAAAGAAATG  
CAAATTTTCTAGTCACATCCCAGACCTGCTGAATTAGAAATTCTAGGGATGAGGCCAGCAA  
TCTG

**Data file S1. Sequence of donor fragment designed for integration via HDR pathway after DNA cleavage exerted by CRISPR/Cas9 nuclease in hAMSCs.**
